# Supplementary material for: The Interaction between Genetic Polymorphisms in FTO and TCF7L2 Genes and Dietary Intake with Regard to Body Mass and Composition: An Exploratory Study
Source: PubMed Central journal article supplement (PMC6463113; doi:10.3390/jpm9010011), 2019-02-05
Supplement: jpm-09-00011-s001.pdf [file jpm-09-00011-s001.pdf]

**Table S1** Associations of baseline characteristics, lifestyle and dietary habits with *FTO* (*rs9939609*)

|                                                     | <i>FTO</i> ( <i>rs9939609</i> ) |                   |                   | <i>P</i>  |      |
|-----------------------------------------------------|---------------------------------|-------------------|-------------------|-----------|------|
|                                                     | <i>TT</i>                       | <i>TA</i>         | <i>AA</i>         |           |      |
|                                                     | <i>N</i> = 91                   | <i>N</i> = 158    | <i>N</i> = 58     |           |      |
| <b><i>Characteristics and lifestyle factors</i></b> |                                 |                   |                   |           |      |
| <b>Gender, female</b>                               | 54 (59.3)                       | 99 (62.7)         | 40 (69.0)         | 0.49      |      |
| <b>Age (years)</b>                                  | 38.61 ± 13.37                   | 41.28 ± 14.53     | 37.99 ± 13.11     | 0.18      |      |
| <b>Crowding index</b>                               | 1.52 ± 0.88                     | 1.54 ± 0.88       | 1.60 ± 0.76       | 0.86      |      |
| <b>Levels of physical activity</b>                  | Low                             | 33 (36.3)         | 75 (47.5)         | 29 (50.0) | 0.40 |
|                                                     | Moderate                        | 34 (37.4)         | 47 (29.8)         | 18 (31.0) |      |
|                                                     | High                            | 24 (26.4)         | 36 (22.8)         | 11 (19.0) |      |
| <b>Physical activity</b>                            | None                            | 12 (13.2)         | 22 (13.9)         | 10 (17.2) | 0.77 |
|                                                     | Any                             | 79 (86.8)         | 136 (86.1)        | 48 (82.8) |      |
| <b>Cigarette smoker</b>                             | Never                           | 46 (50.6)         | 75 (47.5)         | 27 (46.6) | 0.44 |
|                                                     | Current                         | 35 (38.5)         | 70 (44.3)         | 29 (50.0) |      |
|                                                     | Past                            | 10 (11.0)         | 13 (8.2)          | 2 (3.5)   |      |
| <b>Narghileh smoker</b>                             | Never                           | 49 (53.9)         | 94 (59.5)         | 34 (58.6) | 0.93 |
|                                                     | Current                         | 32 (35.2)         | 50 (31.7)         | 18 (31.0) |      |
|                                                     | Past                            | 10 (11.0)         | 14 (8.9)          | 6 (10.3)  |      |
| <b>Alcohol drinker</b>                              | Never                           | 63 (69.2)         | 113 (71.5)        | 46 (79.3) | 0.15 |
|                                                     | Current                         | 23 (25.3)         | 37 (23.4)         | 6 (10.3)  |      |
|                                                     | Past                            | 5 (5.5)           | 8 (5.1)           | 6 (10.3)  |      |
| <b><i>Body mass and composition</i></b>             |                                 |                   |                   |           |      |
| <b>Body mass index (BMI) (kg/m<sup>2</sup>)</b>     | 28.56 ± 5.56                    | 27.07 ± 5.43      | 28.64 ± 5.99      | 0.06      |      |
| <b>Body fat (kg)</b>                                | 27.48 ± 11.56                   | 24.91 ± 10.93     | 28.28 ± 11.99     | 0.08      |      |
| <b>Muscle mass (kg)</b>                             | 27.41 ± 6.66                    | 26.22 ± 6.21      | 25.40 ± 6.27      | 0.15      |      |
| <b><i>Daily macronutrient intake</i></b>            |                                 |                   |                   |           |      |
| <b>Total energy (Kcal)</b>                          | 3739.09 ± 2043.47               | 3499.87 ± 2049.69 | 3619.59 ± 1968.32 | 0.67      |      |
| <b>Carbohydrates (g)</b>                            | 465.62 ± 266.87                 | 432.46 ± 263.16   | 424.93 ± 208.40   | 0.53      |      |
| <b>Percent Kcal from carbohydrates (%)</b>          | 50.87 ± 8.80                    | 50.04 ± 7.77      | 48.96 ± 10.07     | 0.41      |      |
| <b>Proteins (g)</b>                                 | 115.44 ± 65.10                  | 111.94 ± 66.53    | 128.71 ± 113.47   | 0.37      |      |
| <b>Percent Kcal from proteins (%)</b>               | 12.46 ± 2.65                    | 13.06 ± 3.49      | 13.50 ± 5.17      | 0.21      |      |
| <b>Sugar (g)</b>                                    | 143.44 ± 164.05                 | 126.88 ± 96.44    | 127.81 ± 74.14    | 0.54      |      |
| <b>Percent Kcal from sugar (%)</b>                  | 14.80 ± 6.89                    | 14.65 ± 6.12      | 15.04 ± 6.85      | 0.93      |      |
| <b>Total Fat (g)</b>                                | 150.35 ± 86.79                  | 145.94 ± 86.74    | 158.84 ± 104.62   | 0.65      |      |
| <b>Percent Kcal from total fat (%)</b>              | 37.92 ± 7.58                    | 39.29 ± 7.50      | 39.79 ± 9.27      | 0.29      |      |
| <b>Saturated fat (g)</b>                            | 43.59 ± 27.77                   | 41.08 ± 28.89     | 46.18 ± 31.84     | 0.50      |      |
| <b>Percent Kcal from saturated fat (%)</b>          | 10.30 ± 2.68                    | 10.27 ± 2.76      | 10.70 ± 2.86      | 0.58      |      |
| <b>Monounsaturated fat (MUFA) (g)</b>               | 55.84 ± 33.26                   | 53.73 ± 32.85     | 57.92 ± 40.19     | 0.71      |      |
| <b>Percent kcal from MUFA (%)</b>                   | 13.62 ± 4.02                    | 13.85 ± 3.93      | 14.00 ± 4.39      | 0.84      |      |
| <b>Polyunsaturated fat (PUFA) (g)</b>               | 38.13 ± 21.80                   | 39.13 ± 24.54     | 41.63 ± 31.02     | 0.70      |      |
| <b>Percent kcal from PUFA (%)</b>                   | 9.31 ± 3.09                     | 10.31 ± 3.95      | 10.28 ± 4.14      | 0.11      |      |
| <b>Cholesterol (mg)</b>                             | 408.11 ± 458.46                 | 343.35 ± 273.28   | 440.40 ± 449.40   | 0.17      |      |

Data are presented as mean ± SD or *N* (%)

*P* values: chi-square, t-test or one way ANOVA as appropriate

**Table S2.** Interaction between daily dietary intake and *FTO* (*rs9939609*) genotypes on BMI (Kg/m<sup>2</sup>)

|                                    | No. of subjects<br>by genotype<br>(TT/TA/AA) | TT<br>Mean (95% CI)<br>(N = 91) | TA<br>Mean (95% CI)<br>(N = 158) | AA<br>Mean (95% CI)<br>(N = 58) | P-trend <sup>1</sup> | P-trend <sup>2</sup> | P-trend <sup>3</sup> | P-<br>interaction <sup>1</sup> | P-<br>interaction <sup>2</sup> | P-<br>interaction <sup>3</sup> |
|------------------------------------|----------------------------------------------|---------------------------------|----------------------------------|---------------------------------|----------------------|----------------------|----------------------|--------------------------------|--------------------------------|--------------------------------|
| <b>Among ALL</b>                   | 91/158/58                                    | 28.56 (27.40 – 29.71)           | 27.07 (26.21 – 27.92)            | 28.64 (27.07 – 30.22)           | 0.93                 | 0.95                 | 0.87                 | –                              | –                              | –                              |
| <b>Carbohydrates (% of energy)</b> |                                              |                                 |                                  |                                 |                      |                      |                      |                                |                                |                                |
| Tertile 1 (<47.317)                | 30/48/25                                     | 28.87 (26.99 – 30.75)           | 27.30 (25.84 – 28.76)            | 29.42 (26.86 – 31.99)           | 0.70                 | 0.96                 | 0.96                 | 0.46                           | 0.60                           | 0.59                           |
| Tertile 2 (47.317 – 53.984)        | 29/64/15                                     | 27.63 (25.64 – 29.62)           | 26.82 (25.43 – 28.20)            | 27.58 (24.20 – 30.96)           | 0.98                 | 0.99                 | 0.99                 |                                |                                |                                |
| Tertile 3 (>53.984)                | 32/46/18                                     | 29.10 (26.82 – 31.38)           | 27.18 (25.46 – 28.89)            | 28.44 (25.59 – 31.29)           | 0.71                 | 0.66                 | 0.66                 |                                |                                |                                |
| <b>Fat (% of energy)</b>           |                                              |                                 |                                  |                                 |                      |                      |                      |                                |                                |                                |
| Tertile 1 (<35.131)                | 32/43/17                                     | 28.83 (26.47 – 31.19)           | 26.84 (25.00 – 28.67)            | 29.07 (25.68 – 32.46)           | 0.90                 | 0.94                 | 0.94                 | 0.49                           | 0.57                           | 0.46                           |
| Tertile 2 (35.131 – 41.333)        | 30/63/18                                     | 28.06 (26.28 – 29.84)           | 27.51 (26.14 – 28.88)            | 26.33 (24.15 – 28.51)           | 0.26                 | 0.25                 | 0.25                 |                                |                                |                                |
| Tertile 3 (>41.333)                | 29/52/23                                     | 28.77 (26.76 – 30.78)           | 26.72 (25.32 – 28.12)            | 30.13 (27.41 – 32.86)           | 0.39                 | 0.43                 | 0.43                 |                                |                                |                                |
| <b>Protein (% of energy)</b>       |                                              |                                 |                                  |                                 |                      |                      |                      |                                |                                |                                |
| Tertile 1 (<11.700)                | 39/58/23                                     | 29.27 (27.79 – 30.74)           | 26.73 (25.49 – 27.96)            | 28.53 (25.88 – 31.18)           | 0.57                 | 0.40                 | 0.40                 | 0.94                           | 0.77                           | 0.76                           |
| Tertile 2 (11.700 – 13.985)        | 31/50/15                                     | 26.36 (24.50 – 28.21)           | 26.83 (25.21 – 28.46)            | 28.66 (25.45 – 31.87)           | 0.19                 | 0.17                 | 0.17                 |                                |                                |                                |
| Tertile 3 (>13.985)                | 21/50/20                                     | 30.48 (27.30 – 33.67)           | 27.70 (26.01 – 29.40)            | 28.76 (25.82 – 31.70)           | 0.38                 | 0.23                 | 0.23                 |                                |                                |                                |
| <b>Saturated fat (% of energy)</b> |                                              |                                 |                                  |                                 |                      |                      |                      |                                |                                |                                |
| Tertile 1 (<8.595)                 | 26/42/17                                     | 28.53 (26.82 – 30.24)           | 27.07 (25.12 – 29.02)            | 29.63 (26.29 – 32.97)           | 0.54                 | 0.40                 | 0.40                 | 0.30                           | 0.26                           | 0.30                           |
| Tertile 2 (8.595 – 11.034)         | 29/65/10                                     | 28.22 (25.81 – 30.63)           | 27.00 (25.63 – 28.37)            | 30.74 (25.90 – 35.58)           | 0.25                 | 0.31                 | 0.31                 |                                |                                |                                |
| Tertile 3 (>11.034)                | 36/51/31                                     | 28.85 (26.87 – 30.83)           | 27.15 (25.85 – 28.46)            | 27.42 (25.47 – 29.38)           | 0.27                 | 0.19                 | 0.19                 |                                |                                |                                |
| <b>MUFA (% of energy)</b>          |                                              |                                 |                                  |                                 |                      |                      |                      |                                |                                |                                |
| Tertile 1 (<11.890)                | 30/41/21                                     | 28.99 (26.54 – 31.44)           | 26.48 (24.90 – 28.05)            | 29.00 (26.27 – 31.73)           | 1.00                 | 0.93                 | 0.93                 | 0.75                           | 0.87                           | 0.81                           |
| Tertile 2 (11.890 – 14.571)        | 29/66/15                                     | 28.05 (26.10 – 30.00)           | 27.72 (26.40 – 29.05)            | 27.12 (23.64 – 30.60)           | 0.59                 | 0.89                 | 0.89                 |                                |                                |                                |
| Tertile 3 (>14.571)                | 32/51/22                                     | 28.61 (26.80 – 30.42)           | 26.69 (25.05 – 28.34)            | 29.33 (26.73 – 31.94)           | 0.64                 | 0.95                 | 0.95                 |                                |                                |                                |
| <b>PUFA (% of energy)</b>          |                                              |                                 |                                  |                                 |                      |                      |                      |                                |                                |                                |
| Tertile 1 (<8.426)                 | 39/47/21                                     | 28.88 (26.09 – 30.94)           | 27.17 (25.19 – 29.14)            | 28.03 (25.11 – 30.94)           | 0.63                 | 0.74                 | 0.74                 | 0.35                           | 0.46                           | 0.44                           |
| Tertile 2 (8.426 – 10.930)         | 29/61/18                                     | 28.18 (26.13 – 30.23)           | 26.91 (25.74 – 28.08)            | 28.39 (25.99 – 30.79)           | 0.89                 | 0.44                 | 0.44                 |                                |                                |                                |
| Tertile 3 (>10.930)                | 23/50/19                                     | 28.49 (26.61 – 30.38)           | 27.18 (25.71 – 28.64)            | 29.56 (26.34 – 32.78)           | 0.52                 | 0.56                 | 0.56                 |                                |                                |                                |

<sup>1</sup>p-value crude<sup>2</sup>p-value adjusted for age and sex<sup>3</sup>p-value adjusted for age, sex and physical activity

**Table S3.** Interaction between daily dietary intake and *FTO* (*rs1558902*) genotypes on **body fat** (kg)

|                                    | No. of subjects<br>by genotype<br>( <i>TT/TA/AA</i> ) | <i>TT</i><br>Mean (95% CI)<br>( <i>N</i> = 85) | <i>TA</i><br>Mean (95% CI)<br>( <i>N</i> = 165) | <i>AA</i><br>Mean (95% CI)<br>( <i>N</i> = 58) | <i>P</i> -trend <sup>1</sup> | <i>P</i> -trend <sup>2</sup> | <i>P</i> -trend <sup>3</sup> | <i>P</i> -<br>interaction <sup>1</sup> | <i>P</i> -<br>interaction <sup>2</sup> | <i>P</i> -<br>interaction <sup>3</sup> |
|------------------------------------|-------------------------------------------------------|------------------------------------------------|-------------------------------------------------|------------------------------------------------|------------------------------|------------------------------|------------------------------|----------------------------------------|----------------------------------------|----------------------------------------|
| <b>Among ALL</b>                   | 85/165/58                                             | 27.48 (24.95 – 30.00)                          | 25.30 (23.59 – 27.00)                           | 27.12 (24.01 – 30.24)                          | 0.86                         | 0.76                         | 0.61                         | –                                      | –                                      | –                                      |
| <b>Carbohydrates (% of energy)</b> |                                                       |                                                |                                                 |                                                |                              |                              |                              |                                        |                                        |                                        |
| Tertile 1 (<47.317)                | 25/53/26                                              | 26.06 (21.56 – 30.56)                          | 25.19 (22.15 – 28.23)                           | 27.50 (22.27 – 32.73)                          | 0.66                         | 0.86                         | 0.83                         | 0.16                                   | 0.26                                   | 0.24                                   |
| Tertile 2 (47.317 – 53.984)        | 29/64/15                                              | 24.89 (20.90 – 28.89)                          | 24.23 (21.48 – 26.99)                           | 26.52 (20.02 – 33.02)                          | 0.64                         | 0.45                         | 0.49                         |                                        |                                        |                                        |
| Tertile 3 (>53.984)                | 31/48/17                                              | 31.03 (26.32 – 35.75)                          | 26.84 (23.56 – 30.11)                           | 27.08 (21.54 – 32.63)                          | 0.27                         | 0.32                         | 0.26                         |                                        |                                        |                                        |
| <b>Fat (% of energy)</b>           |                                                       |                                                |                                                 |                                                |                              |                              |                              |                                        |                                        |                                        |
| Tertile 1 (<35.131)                | 31/45/16                                              | 29.23 (24.04 – 34.42)                          | 24.22 (20.85 – 27.59)                           | 29.90 (23.39 – 36.41)                          | 0.86                         | 0.89                         | 0.98                         | 0.61                                   | 0.63                                   | 0.49                                   |
| Tertile 2 (35.131 – 41.333)        | 27/67/17                                              | 24.87 (20.81 – 28.94)                          | 26.66 (23.90 – 29.42)                           | 21.50 (17.28 – 25.72)                          | 0.31                         | 0.46                         | 0.40                         |                                        |                                        |                                        |
| Tertile 3 (>41.333)                | 27/53/25                                              | 28.06 (24.19 – 31.94)                          | 24.49 (21.54 – 27.44)                           | 29.17 (23.91 – 34.43)                          | 0.72                         | 0.84                         | 0.84                         |                                        |                                        |                                        |
| <b>Protein (% of energy)</b>       |                                                       |                                                |                                                 |                                                |                              |                              |                              |                                        |                                        |                                        |
| Tertile 1 (<11.700)                | 39/57/25                                              | 29.44 (26.15 – 32.73)                          | 25.54 (22.92 – 28.17)                           | 25.48 (20.43 – 30.54)                          | 0.14                         | 0.09                         | 0.07                         | 0.29                                   | 0.20                                   | 0.18                                   |
| Tertile 2 (11.700 – 13.985)        | 27/54/15                                              | 23.92 (20.17 – 27.67)                          | 24.58 (21.47 – 27.69)                           | 28.97 (22.87 – 35.06)                          | 0.15                         | 0.09                         | 0.09                         |                                        |                                        |                                        |
| Tertile 3 (>13.985)                | 19/54/18                                              | 28.49 (20.65 – 36.33)                          | 25.76 (22.45 – 29.06)                           | 27.87 (21.77 – 33.97)                          | 0.89                         | 0.52                         | 0.39                         |                                        |                                        |                                        |
| <b>Saturated fat (% of energy)</b> |                                                       |                                                |                                                 |                                                |                              |                              |                              |                                        |                                        |                                        |
| Tertile 1 (<8.595)                 | 26/42/17                                              | 27.69 (24.00 – 31.38)                          | 27.09 (23.17 – 31.01)                           | 28.46 (21.68 – 35.24)                          | 0.84                         | 0.65                         | 0.68                         | 0.60                                   | 0.53                                   | 0.59                                   |
| Tertile 2 (8.595 – 11.034)         | 28/65/11                                              | 26.96 (22.11 – 31.82)                          | 25.12 (22.31 – 27.93)                           | 28.28 (19.90 – 36.66)                          | 0.75                         | 0.98                         | 0.87                         |                                        |                                        |                                        |
| Tertile 3 (>11.034)                | 31/58/30                                              | 37.75 (22.93 – 32.58)                          | 24.20 (21.68 – 26.72)                           | 25.94 (21.81 – 30.08)                          | 0.52                         | 0.37                         | 0.35                         |                                        |                                        |                                        |
| <b>MUFA (% of energy)</b>          |                                                       |                                                |                                                 |                                                |                              |                              |                              |                                        |                                        |                                        |
| Tertile 1 (<11.890)                | 29/44/19                                              | 30.61 (25.38 – 35.84)                          | 23.63 (20.40 – 26.86)                           | 29.84 (24.43 – 35.25)                          | 0.83                         | 0.94                         | 0.80                         | 0.54                                   | 0.58                                   | 0.48                                   |
| Tertile 2 (11.890 – 14.571)        | 27/65/18                                              | 24.94 (20.52 – 29.36)                          | 26.34 (23.75 – 28.92)                           | 23.56 (17.69 – 29.42)                          | 0.68                         | 0.84                         | 0.92                         |                                        |                                        |                                        |
| Tertile 3 (>14.571)                | 29/56/21                                              | 26.70 (23.09 – 30.31)                          | 25.40 (22.15 – 28.66)                           | 27.73 (22.18 – 33.28)                          | 0.76                         | 0.98                         | 0.87                         |                                        |                                        |                                        |
| <b>PUFA (% of energy)</b>          |                                                       |                                                |                                                 |                                                |                              |                              |                              |                                        |                                        |                                        |
| Tertile 1 (<8.426)                 | 36/51/21                                              | 28.46 (23.97 – 32.94)                          | 24.86 (21.27 – 28.45)                           | 26.59 (20.92 – 32.26)                          | 0.60                         | 0.87                         | 0.73                         | 0.30                                   | 0.39                                   | 0.31                                   |
| Tertile 2 (8.426 – 10.930)         | 26/66/16                                              | 27.75 (22.65 – 32.86)                          | 24.83 (22.38 – 27.29)                           | 26.79 (21.53 – 32.06)                          | 0.78                         | 0.42                         | 0.20                         |                                        |                                        |                                        |
| Tertile 3 (>10.930)                | 23/48/21                                              | 25.63 (22.33 – 28.92)                          | 26.40 (23.27 – 29.52)                           | 27.91 (21.97 – 33.84)                          | 0.48                         | 0.49                         | 0.48                         |                                        |                                        |                                        |

<sup>1</sup>*p*-value crude<sup>2</sup>*p*-value adjusted for age and sex<sup>3</sup>*p*-value adjusted for age and sex and physical activity

**Table S4.** Interaction between daily dietary intake and *TCF7L2* (*rs7903146*) genotypes on **body fat** (kg)

|                                    | No. of subjects<br>by genotype<br>(CC/CT/TT) | CC<br>Mean (95% CI)<br>(N = 134) | CT<br>Mean (95% CI)<br>(N = 130) | TT<br>Mean (95% CI)<br>(N = 43) | P- trend <sup>1</sup> | P- trend <sup>2</sup> | P- trend <sup>3</sup> | P-<br>interaction <sup>1</sup> | P-<br>interaction <sup>2</sup> | P-<br>interaction <sup>3</sup> |
|------------------------------------|----------------------------------------------|----------------------------------|----------------------------------|---------------------------------|-----------------------|-----------------------|-----------------------|--------------------------------|--------------------------------|--------------------------------|
| <b>Among ALL</b>                   | 134/130/43                                   | 26.27 (24.27 – 28.28)            | 26.15 (24.26 – 28.05)            | 26.32 (22.54 – 30.10)           | 0.98                  | 0.94                  | 0.95                  | –                              | –                              | –                              |
| <b>Carbohydrates (% of energy)</b> |                                              |                                  |                                  |                                 |                       |                       |                       |                                |                                |                                |
| Tertile 1 (<47.317)                | 43/46/15                                     | 27.53 (23.83 – 31.22)            | 25.67 (22.52 – 28.82)            | 22.47 (15.77 – 29.17)           | 0.14                  | 0.14                  | 0.13                  | 0.19                           | 0.20                           | 0.20                           |
| Tertile 2 (47.317 – 53.984)        | 44/49/15                                     | 22.81 (19.39 – 26.23)            | 26.20 (23.19 – 29.20)            | 25.57 (19.32 – 31.82)           | 0.40                  | 0.31                  | 0.26                  |                                |                                |                                |
| Tertile 3 (>53.984)                | 47/35/13                                     | 28.37 (25.02 – 31.73)            | 26.73 (22.57 – 30.90)            | 31.64 (24.00 – 39.28)           | 0.38                  | 0.45                  | 0.47                  |                                |                                |                                |
| <b>Fat (% of energy)</b>           |                                              |                                  |                                  |                                 |                       |                       |                       |                                |                                |                                |
| Tertile 1 (<35.131)                | 47/28/16                                     | 27.06 (23.24 – 30.87)            | 27.62 (22.19 – 33.05)            | 24.95 (20.03 – 29.87)           | 0.57                  | 0.64                  | 0.64                  | 0.33                           | 0.38                           | 0.36                           |
| Tertile 2 (35.131 – 41.333)        | 46/51/14                                     | 22.98 (19.97 – 25.99)            | 26.03 (23.41 – 28.65)            | 31.34 (22.69 – 39.98)           | <b>0.010</b>          | 0.031                 | 0.023                 |                                |                                |                                |
| Tertile 3 (>41.333)                | 41/51/13                                     | 29.07 (25.52 – 32.62)            | 25.47 (22.48 – 28.46)            | 22.61 (15.64 – 29.58)           | 0.07                  | 0.11                  | 0.09                  |                                |                                |                                |
| <b>Protein (% of energy)</b>       |                                              |                                  |                                  |                                 |                       |                       |                       |                                |                                |                                |
| Tertile 1 (<11.700)                | 53/50/18                                     | 27.16 (23.90 – 30.42)            | 26.47 (23.68 – 29.27)            | 26.56 (22.09 – 31.04)           | 0.84                  | 0.80                  | 0.76                  | 0.76                           | 0.64                           | 0.59                           |
| Tertile 2 (11.700 – 13.985)        | 45/36/14                                     | 25.50 (22.11 – 28.88)            | 23.68 (20.65 – 26.70)            | 26.98 (18.74 – 35.22)           | 0.66                  | 0.62                  | 0.61                  |                                |                                |                                |
| Tertile 3 (>13.985)                | 36/44/11                                     | 25.94 (21.76 – 30.12)            | 27.82 (23.81 – 31.82)            | 25.09 (14.90 – 35.28)           | 0.85                  | 0.94                  | 0.89                  |                                |                                |                                |
| <b>Saturated fat (% of energy)</b> |                                              |                                  |                                  |                                 |                       |                       |                       |                                |                                |                                |
| Tertile 1 (<8.595)                 | 40/33/11                                     | 26.54 (22.93 – 30.15)            | 26.82 (22.73 – 30.91)            | 33.15 (24.26 – 42.05)           | 0.10                  | 0.10                  | 0.11                  | 0.030                          | <b>0.012</b>                   | <b>0.013</b>                   |
| Tertile 2 (8.595 – 11.034)         | 47/42/15                                     | 24.43 (21.16 – 27.71)            | 28.21 (24.58 – 31.83)            | 24.37 (16.91 – 31.82)           | 0.99                  | 0.52                  | 0.50                  |                                |                                |                                |
| Tertile 3 (>11.034)                | 47/55/17                                     | 27.89 (24.18 – 31.59)            | 24.18 (21.54 – 26.82)            | 23.62 (18.87 – 28.38)           | 0.17                  | 0.10                  | 0.10                  |                                |                                |                                |
| <b>MUFA (% of energy)</b>          |                                              |                                  |                                  |                                 |                       |                       |                       |                                |                                |                                |
| Tertile 1 (<11.890)                | 43/37/12                                     | 27.77 (24.05 – 31.49)            | 26.79 (22.41 – 31.17)            | 25.75 (19.51 – 31.99)           | 0.62                  | 0.60                  | 0.55                  | 0.91                           | 0.91                           | 0.84                           |
| Tertile 2 (11.890 – 14.571)        | 54/39/16                                     | 24.64 (21.46 – 27.82)            | 25.18 (22.28 – 28.08)            | 29.14 (22.72 – 35.56)           | 0.15                  | 0.11                  | 0.07                  |                                |                                |                                |
| Tertile 3 (>14.571)                | 37/54/15                                     | 26.92 (23.11 – 30.72)            | 26.42 (23.51 – 29.33)            | 23.77 (15.82 – 31.72)           | 0.37                  | 0.60                  | 0.55                  |                                |                                |                                |
| <b>PUFA (% of energy)</b>          |                                              |                                  |                                  |                                 |                       |                       |                       |                                |                                |                                |
| Tertile 1 (<8.426)                 | 49/41/18                                     | 26.93 (23.20 – 30.67)            | 26.18 (22.16 – 30.19)            | 25.43 (18.80 – 32.06)           | 0.67                  | 0.81                  | 0.76                  | 0.97                           | 0.71                           | 0.74                           |
| Tertile 2 (8.426 – 10.930)         | 49/43/15                                     | 24.33 (21.43 – 27.24)            | 27.06 (23.64 – 30.49)            | 26.88 (20.59 – 33.17)           | 0.42                  | 0.32                  | 0.31                  |                                |                                |                                |
| Tertile 3 (>10.930)                | 36/46/10                                     | 28.02 (24.00 – 32.04)            | 25.28 (22.63 – 27.94)            | 27.09 (17.87 – 36.31)           | 0.81                  | 0.49                  | 0.50                  |                                |                                |                                |

<sup>1</sup>p-value crude

<sup>2</sup>p-value adjusted for age and sex

<sup>3</sup>p-value adjusted for age and sex and physical activity

**Table S5.** Interaction between daily dietary intake and *FTO* (*rs9939609*) genotypes on **body fat** (kg)

|                                    | No. of subjects<br>by genotype<br>( <i>TT/TA/AA</i> ) | <i>TT</i><br>Mean (95% CI)<br>( <i>N</i> = 91) | <i>TA</i><br>Mean (95% CI)<br>( <i>N</i> = 158) | <i>AA</i><br>Mean (95% CI)<br>( <i>N</i> = 58) | <i>P</i> -<br>trend <sup>1</sup> | <i>P</i> -<br>trend <sup>2</sup> | <i>P</i> -<br>trend <sup>3</sup> | <i>P</i> -<br>interaction <sup>1</sup> | <i>P</i> -<br>interaction <sup>2</sup> | <i>P</i> -<br>interaction <sup>3</sup> |
|------------------------------------|-------------------------------------------------------|------------------------------------------------|-------------------------------------------------|------------------------------------------------|----------------------------------|----------------------------------|----------------------------------|----------------------------------------|----------------------------------------|----------------------------------------|
| <b>Among ALL</b>                   | 91/158/58                                             | 27.47 (25.07 – 29.88)                          | 24.91 (23.19 – 26.62)                           | 28.28 (25.12 – 31.43)                          | 0.67                             | 0.86                             | 0.97                             |                                        |                                        |                                        |
| <b>Carbohydrates (% of energy)</b> |                                                       |                                                |                                                 |                                                |                                  |                                  |                                  |                                        |                                        |                                        |
| Tertile 1 (<47.317)                | 30/48/25                                              | 26.08 (22.23 – 29.93)                          | 24.78 (21.65 – 27.90)                           | 28.89 (23.36 – 34.43)                          | 0.36                             | 0.71                             | 0.71                             | 0.14                                   | 0.21                                   | 0.20                                   |
| Tertile 2 (47.317 – 53.984)        | 29/64/15                                              | 24.80 (20.68 – 28.92)                          | 24.13 (21.42 – 26.83)                           | 27.17 (20.62 – 33.71)                          | 0.50                             | 0.53                             | 0.53                             |                                        |                                        |                                        |
| Tertile 3 (>53.984)                | 32/46/18                                              | 31.21 (26.65 – 35.77)                          | 26.12 (22.75 – 29.50)                           | 28.34 (23.08 – 33.60)                          | 0.41                             | 0.37                             | 0.37                             |                                        |                                        |                                        |
| <b>Fat (% of energy)</b>           |                                                       |                                                |                                                 |                                                |                                  |                                  |                                  |                                        |                                        |                                        |
| Tertile 1 (<35.131)                | 32/43/17                                              | 29.42 (24.39 – 34.45)                          | 24.17 (20.73 – 27.60)                           | 29.05 (22.58 – 35.52)                          | 0.92                             | 0.77                             | 0.77                             | 0.32                                   | 0.32                                   | 0.24                                   |
| Tertile 2 (35.131 – 41.333)        | 30/63/18                                              | 25.46 (21.61 – 29.30)                          | 25.58 (22.71 – 28.45)                           | 24.89 (20.20 – 29.58)                          | 0.86                             | 0.71                             | 0.71                             |                                        |                                        |                                        |
| Tertile 3 (>41.333)                | 29/52/23                                              | 27.41 (23.70 – 31.13)                          | 24.70 (21.84 – 27.57)                           | 30.36 (24.65 – 36.07)                          | 0.33                             | 0.40                             | 0.40                             |                                        |                                        |                                        |
| <b>Protein (% of energy)</b>       |                                                       |                                                |                                                 |                                                |                                  |                                  |                                  |                                        |                                        |                                        |
| Tertile 1 (<11.700)                | 39/58/23                                              | 29.49 (26.13 – 32.84)                          | 24.81 (22.30 – 27.32)                           | 28.05 (22.83 – 33.27)                          | 0.60                             | 0.30                             | 0.30                             | 0.52                                   | 0.32                                   | 0.31                                   |
| Tertile 2 (11.700 – 13.985)        | 31/50/15                                              | 23.56 (20.06 – 27.06)                          | 25.36 (22.10 – 28.61)                           | 27.30 (20.86 – 33.74)                          | 0.28                             | 0.25                             | 0.25                             |                                        |                                        |                                        |
| Tertile 3 (>13.985)                | 21/50/20                                              | 29.52 (22.69 – 36.35)                          | 24.57 (21.14 – 28.00)                           | 29.27 (23.32 – 35.21)                          | 0.95                             | 0.57                             | 0.57                             |                                        |                                        |                                        |
| <b>Saturated fat (% of energy)</b> |                                                       |                                                |                                                 |                                                |                                  |                                  |                                  |                                        |                                        |                                        |
| Tertile 1 (<8.595)                 | 26/42/17                                              | 28.33 (24.67 – 31.99)                          | 25.90 (21.97 – 29.83)                           | 30.43 (23.97 – 36.89)                          | 0.57                             | 0.60                             | 0.60                             | 0.50                                   | 0.49                                   | 0.54                                   |
| Tertile 2 (8.595 – 11.034)         | 29/65/10                                              | 27.11 (22.38 – 31.84)                          | 24.44 (21.77 – 27.11)                           | 32.38 (22.22 – 42.54)                          | 0.22                             | 0.21                             | 0.21                             |                                        |                                        |                                        |
| Tertile 3 (>11.034)                | 36/51/31                                              | 27.15 (22.86 – 31.44)                          | 24.68 (21.94 – 27.42)                           | 25.77 (21.86 – 29.68)                          | 0.61                             | 0.35                             | 0.35                             |                                        |                                        |                                        |
| <b>MUFA (% of energy)</b>          |                                                       |                                                |                                                 |                                                |                                  |                                  |                                  |                                        |                                        |                                        |
| Tertile 1 (<11.890)                | 30/41/21                                              | 30.37 (25.30 – 35.44)                          | 23.65 (20.28 – 27.02)                           | 29.23 (23.99 – 34.46)                          | 0.74                             | 0.61                             | 0.61                             | 0.36                                   | 0.42                                   | 0.37                                   |
| Tertile 2 (11.890 – 14.571)        | 29/66/15                                              | 25.12 (20.83 – 29.41)                          | 25.84 (23.26 – 28.41)                           | 25.03 (18.40 – 31.67)                          | 0.98                             | 0.86                             | 0.86                             |                                        |                                        |                                        |
| Tertile 3 (>14.571)                | 32/51/22                                              | 26.90 (23.53 – 30.26)                          | 24.72 (21.40 – 28.03)                           | 29.58 (24.00 – 35.16)                          | 0.39                             | 0.79                             | 0.79                             |                                        |                                        |                                        |
| <b>PUFA (% of energy)</b>          |                                                       |                                                |                                                 |                                                |                                  |                                  |                                  |                                        |                                        |                                        |
| Tertile 1 (<8.426)                 | 39/47/21                                              | 28.22 (23.96 – 32.48)                          | 25.16 (21.46 – 28.85)                           | 26.69 (20.90 – 32.47)                          | 0.66                             | 0.71                             | 0.71                             | 0.31                                   | 0.38                                   | 0.37                                   |
| Tertile 2 (8.426 – 10.930)         | 29/61/18                                              | 27.36 (22.62 – 32.10)                          | 24.03 (21.57 – 26.49)                           | 29.46 (24.42 – 34.51)                          | 0.51                             | 0.68                             | 0.68                             |                                        |                                        |                                        |
| Tertile 3 (>10.930)                | 23/50/19                                              | 26.35 (23.35 – 29.36)                          | 25.74 (22.64 – 28.85)                           | 28.91 (22.56 – 35.27)                          | 0.44                             | 0.47                             | 0.47                             |                                        |                                        |                                        |

<sup>1</sup>*p*-value crude<sup>2</sup>*p*-value adjusted for age and sex<sup>3</sup>*p*-value adjusted for age, sex and physical activity

**Table S6.** Interaction between daily dietary intake and *FTO* (*rs1558902*) genotypes on muscle mass (kg)

|                                    | No. of subjects<br>by genotype<br>( <i>TT/TA/AA</i> ) | <i>TT</i><br>Mean (95% CI)<br>( <i>N</i> = 85) | <i>TA</i><br>Mean (95% CI)<br>( <i>N</i> = 165) | <i>AA</i><br>Mean (95% CI)<br>( <i>N</i> = 58) | <i>P</i> -trend <sup>1</sup> | <i>P</i> - trend <sup>2</sup> | <i>P</i> - trend <sup>3</sup> | <i>P</i> -<br>interaction <sup>1</sup> | <i>P</i> -<br>interaction <sup>2</sup> | <i>P</i> -<br>interaction <sup>3</sup> |
|------------------------------------|-------------------------------------------------------|------------------------------------------------|-------------------------------------------------|------------------------------------------------|------------------------------|-------------------------------|-------------------------------|----------------------------------------|----------------------------------------|----------------------------------------|
| <b>Among ALL</b>                   | 85/165/58                                             | 27.41 (25.96 – 28.85)                          | 26.35 (25.40 – 27.30)                           | 25.21 (23.57 – 26.85)                          | 0.043                        | 0.06                          | 0.039                         | –                                      | –                                      | –                                      |
| <b>Carbohydrates (% of energy)</b> |                                                       |                                                |                                                 |                                                |                              |                               |                               |                                        |                                        |                                        |
| Tertile 1 (<47.317)                | 25/53/26                                              | 29.48 (26.44 – 32.52)                          | 27.79 (26.21 – 29.37)                           | 26.08 (23.67 – 28.48)                          | 0.05                         | 0.14                          | 0.13                          | 0.55                                   | 0.97                                   | 1.00                                   |
| Tertile 2 (47.317 – 53.984)        | 29/64/15                                              | 26.98 (24.50 – 29.46)                          | 26.01 (24.33 – 27.69)                           | 24.60 (21.04 – 28.16)                          | 0.26                         | 0.29                          | 0.25                          |                                        |                                        |                                        |
| Tertile 3 (>53.984)                | 31/48/17                                              | 26.14 (23.89 – 28.38)                          | 25.20 (23.53 – 26.87)                           | 24.42 (20.95 – 27.90)                          | 0.35                         | 0.26                          | 0.22                          |                                        |                                        |                                        |
| <b>Fat (% of energy)</b>           |                                                       |                                                |                                                 |                                                |                              |                               |                               |                                        |                                        |                                        |
| Tertile 1 (<35.131)                | 31/45/16                                              | 27.39 (25.28 – 29.49)                          | 26.87 (24.91 – 28.82)                           | 25.62 (21.43 – 29.81)                          | 0.38                         | 0.69                          | 0.63                          | 0.83                                   | 0.96                                   | 0.80                                   |
| Tertile 2 (35.131 – 41.333)        | 27/67/17                                              | 28.56 (25.37 – 31.75)                          | 26.45 (24.91 – 27.99)                           | 24.90 (21.77 – 28.03)                          | 0.08                         | 0.020                         | <b>0.016</b>                  |                                        |                                        |                                        |
| Tertile 3 (>41.333)                | 27/53/25                                              | 26.27 (23.79 – 28.76)                          | 25.78 (24.17 – 27.38)                           | 25.16 (22.93 – 27.39)                          | 0.49                         | 0.61                          | 0.60                          |                                        |                                        |                                        |
| <b>Protein (% of energy)</b>       |                                                       |                                                |                                                 |                                                |                              |                               |                               |                                        |                                        |                                        |
| Tertile 1 (<11.700)                | 39/57/25                                              | 27.52 (25.37 – 29.67)                          | 24.80 (23.28 – 26.31)                           | 24.51 (21.99 – 27.03)                          | 0.06                         | 0.13                          | 0.08                          | 0.86                                   | 0.72                                   | 0.75                                   |
| Tertile 2 (11.700 – 13.985)        | 27/54/15                                              | 25.17 (22.95 – 27.39)                          | 26.11 (24.40 – 27.82)                           | 25.83 (21.97 – 29.68)                          | 0.74                         | 0.92                          | 0.92                          |                                        |                                        |                                        |
| Tertile 3 (>13.985)                | 19/54/18                                              | 30.36 (26.79 – 33.92)                          | 28.22 (26.52 – 29.92)                           | 25.67 (22.63 – 28.71)                          | 0.029                        | 0.07                          | 0.05                          |                                        |                                        |                                        |
| <b>Saturated fat (% of energy)</b> |                                                       |                                                |                                                 |                                                |                              |                               |                               |                                        |                                        |                                        |
| Tertile 1 (<8.595)                 | 26/42/17                                              | 28.10 (25.17 – 31.04)                          | 26.36 (24.53 – 28.19)                           | 26.42 (22.32 – 30.51)                          | 0.43                         | 0.59                          | 0.62                          | 0.60                                   | 0.39                                   | 0.44                                   |
| Tertile 2 (8.595 – 11.034)         | 28/65/11                                              | 25.36 (23.25 – 27.48)                          | 25.76 (24.25 – 27.26)                           | 22.86 (20.33 – 25.40)                          | 0.22                         | 0.37                          | 0.25                          |                                        |                                        |                                        |
| Tertile 3 (>11.034)                | 31/58/30                                              | 28.66 (26.09 – 31.24)                          | 27.00 (25.28 – 28.73)                           | 25.39 (23.21 – 27.56)                          | 0.05                         | 0.039                         | 0.037                         |                                        |                                        |                                        |
| <b>MUFA (% of energy)</b>          |                                                       |                                                |                                                 |                                                |                              |                               |                               |                                        |                                        |                                        |
| Tertile 1 (<11.890)                | 29/44/19                                              | 27.82 (25.47 – 30.17)                          | 25.98 (24.09 – 27.86)                           | 24.65 (21.01 – 28.28)                          | 0.10                         | 0.26                          | 0.20                          | 0.65                                   | 0.65                                   | 0.55                                   |
| Tertile 2 (11.890 – 14.571)        | 27/65/18                                              | 27.63 (24.81 – 30.45)                          | 27.12 (25.52 – 28.71)                           | 26.27 (23.33 – 29.21)                          | 0.50                         | 0.28                          | 0.35                          |                                        |                                        |                                        |
| Tertile 3 (>14.571)                | 29/56/21                                              | 26.79 (24.12 – 29.45)                          | 25.75 (24.17 – 27.33)                           | 24.81 (22.35 – 27.26)                          | 0.26                         | 0.38                          | 0.30                          |                                        |                                        |                                        |
| <b>PUFA (% of energy)</b>          |                                                       |                                                |                                                 |                                                |                              |                               |                               |                                        |                                        |                                        |
| Tertile 1 (<8.426)                 | 36/51/21                                              | 27.63 (25.56 – 29.70)                          | 26.55 (24.67 – 28.43)                           | 25.64 (22.23 – 29.06)                          | 0.28                         | 0.20                          | 0.17                          | 0.48                                   | 0.25                                   | 0.20                                   |
| Tertile 2 (8.426 – 10.930)         | 26/66/16                                              | 29.38 (26.20 – 32.55)                          | 26.95 (25.38 – 28.52)                           | 24.80 (22.37 – 27.23)                          | 0.029                        | 0.040                         | 0.017                         |                                        |                                        |                                        |
| Tertile 3 (>10.930)                | 23/48/21                                              | 24.83 (22.44 – 27.21)                          | 25.31 (23.76 – 26.85)                           | 25.09 (22.24 – 27.94)                          | 0.94                         | 0.69                          | 0.59                          |                                        |                                        |                                        |

<sup>1</sup>*p*-value crude

<sup>2</sup>*p*-value adjusted for age and sex

<sup>3</sup>*p*-value adjusted for age and sex and physical activity

**Table S7.** Interaction between daily dietary intake and *TCF7L2* (*rs7903146*) genotypes on muscle mass (kg)

|                                    | No. of subjects<br>by genotype<br>(CC/CT/TT) | CC<br>Mean (95% CI)<br>(N = 134) | CT<br>Mean (95% CI)<br>(N = 130) | TT<br>Mean (95% CI)<br>(N = 43) | P-trend <sup>1</sup> | P-trend <sup>2</sup> | P-trend <sup>3</sup> | P-<br>interaction <sup>1</sup> | P-<br>interaction <sup>2</sup> | P-<br>interaction <sup>3</sup> |
|------------------------------------|----------------------------------------------|----------------------------------|----------------------------------|---------------------------------|----------------------|----------------------|----------------------|--------------------------------|--------------------------------|--------------------------------|
| <b>Among ALL</b>                   | 134/130/43                                   | 26.32 (25.27 – 27.37)            | 26.17 (25.07 – 27.27)            | 27.25 (25.07 – 29.43)           | 0.41                 | 0.59                 | 0.60                 | –                              | –                              | –                              |
| <b>Carbohydrates (% of energy)</b> |                                              |                                  |                                  |                                 |                      |                      |                      |                                |                                |                                |
| Tertile 1 (<47.317)                | 43/46/15                                     | 29.03 (27.12 – 30.94)            | 26.67 (24.84 – 28.49)            | 27.54 (23.94 – 31.14)           | 0.43                 | 0.18                 | 0.17                 | 0.23                           | 0.05                           | 0.05                           |
| Tertile 2 (47.317 – 53.984)        | 44/49/15                                     | 25.26 (26.56 – 26.97)            | 26.01 (24.12 – 27.90)            | 28.69 (23.77 – 33.61)           | 0.08                 | 0.21                 | 0.18                 |                                |                                |                                |
| Tertile 3 (>53.984)                | 47/35/13                                     | 24.84 (23.12 – 26.56)            | 25.75 (23.58 – 27.93)            | 25.26 (22.10 – 28.43)           | 0.82                 | 0.41                 | 0.42                 |                                |                                |                                |
| <b>Fat (% of energy)</b>           |                                              |                                  |                                  |                                 |                      |                      |                      |                                |                                |                                |
| Tertile 1 (<35.131)                | 47/28/16                                     | 25.72 (23.95 – 27.49)            | 27.55 (24.74 – 30.35)            | 28.13 (25.03 – 31.23)           | 0.20                 | 0.59                 | 0.59                 | 0.19                           | 0.08                           | 0.07                           |
| Tertile 2 (35.131 – 41.333)        | 46/51/14                                     | 27.06 (25.06 – 29.06)            | 26.24 (24.49 – 27.99)            | 27.39 (22.19 – 32.60)           | 0.87                 | 0.08                 | 0.07                 |                                |                                |                                |
| Tertile 3 (>41.333)                | 41/51/13                                     | 26.19 (24.42 – 27.95)            | 25.35 (23.70 – 27.00)            | 26.02 (22.07 – 29.96)           | 0.93                 | 0.24                 | 0.20                 |                                |                                |                                |
| <b>Protein (% of energy)</b>       |                                              |                                  |                                  |                                 |                      |                      |                      |                                |                                |                                |
| Tertile 1 (<11.700)                | 53/50/18                                     | 26.36 (24.72 – 28.01)            | 24.75 (23.07 – 26.43)            | 25.79 (22.06 – 29.53)           | 0.74                 | 0.95                 | 0.99                 | 0.29                           | 0.78                           | 0.73                           |
| Tertile 2 (11.700 – 13.985)        | 45/36/14                                     | 24.57 (22.95 – 26.19)            | 26.91 (24.64 – 29.17)            | 26.08 (22.56 – 29.60)           | 0.41                 | 0.99                 | 0.96                 |                                |                                |                                |
| Tertile 3 (>13.985)                | 36/44/11                                     | 28.45 (26.18 – 30.72)            | 27.18 (25.26 – 29.10)            | 31.13 (26.64 – 35.61)           | 0.24                 | 0.33                 | 0.32                 |                                |                                |                                |
| <b>Saturated fat (% of energy)</b> |                                              |                                  |                                  |                                 |                      |                      |                      |                                |                                |                                |
| Tertile 1 (<8.595)                 | 40/33/11                                     | 25.86 (23.90 – 27.81)            | 27.85 (25.36 – 30.35)            | 26.89 (21.84 – 31.94)           | 0.65                 | 0.21                 | 0.20                 | 0.06                           | 0.029                          | 0.032                          |
| Tertile 2 (8.595 – 11.034)         | 47/42/15                                     | 24.64 (23.27 – 26.01)            | 24.87 (23.06 – 26.68)            | 28.89 (24.74 – 33.05)           | <b>0.011</b>         | 0.13                 | 0.11                 |                                |                                |                                |
| Tertile 3 (>11.034)                | 47/55/17                                     | 28.40 (26.37 – 30.44)            | 26.16 (24.50 – 27.81)            | 26.04 (22.66 – 29.41)           | 0.20                 | 0.20                 | 0.21                 |                                |                                |                                |
| <b>MUFA (% of energy)</b>          |                                              |                                  |                                  |                                 |                      |                      |                      |                                |                                |                                |
| Tertile 1 (<11.890)                | 43/37/12                                     | 25.73 (23.88 – 27.57)            | 27.21 (24.90 – 29.53)            | 25.42 (20.86 – 29.97)           | 0.89                 | 0.81                 | 0.84                 | 0.86                           | 0.38                           | 0.42                           |
| Tertile 2 (11.890 – 14.571)        | 54/39/16                                     | 27.06 (25.32 – 28.79)            | 26.04 (24.14 – 27.94)            | 29.19 (25.06 – 33.33)           | 0.24                 | 0.37                 | 0.22                 |                                |                                |                                |
| Tertile 3 (>14.571)                | 37/54/15                                     | 25.95 (23.93 – 27.96)            | 25.56 (23.86 – 27.26)            | 26.65 (23.22 – 30.07)           | 0.71                 | 0.69                 | 0.65                 |                                |                                |                                |
| <b>PUFA (% of energy)</b>          |                                              |                                  |                                  |                                 |                      |                      |                      |                                |                                |                                |
| Tertile 1 (<8.426)                 | 49/41/18                                     | 26.57 (24.67 – 28.47)            | 26.93 (24.70 – 29.17)            | 26.72 (23.72 – 29.72)           | 0.94                 | 0.36                 | 0.35                 | 0.40                           | 0.94                           | 0.97                           |
| Tertile 2 (8.426 – 10.930)         | 49/43/15                                     | 26.37 (24.63 – 28.11)            | 26.70 (24.73 – 28.66)            | 30.77 (26.34 – 35.20)           | 0.023                | 0.027                | 0.026                |                                |                                |                                |
| Tertile 3 (>10.930)                | 36/46/10                                     | 25.92 (23.98 – 27.86)            | 25.01 (23.38 – 26.63)            | 22.92 (19.42 – 26.42)           | 0.13                 | 0.41                 | 0.46                 |                                |                                |                                |

<sup>1</sup>p-value crude

<sup>2</sup>p-value adjusted for age and sex

<sup>3</sup>p-value adjusted for age and sex and physical activity

**Table S8.** Interaction between daily dietary intake and *FTO* (*rs9939609*) genotypes on muscle mass (kg)

|                                    | No. of subjects<br>by genotype<br>(TT/TA/AA) | TT<br>Mean (95% CI)<br>(N = 91) | TA<br>Mean (95% CI)<br>(N = 158) | AA<br>Mean (95% CI)<br>(N = 58) | P-trend <sup>1</sup> | P-trend <sup>2</sup> | P-trend <sup>3</sup> | P-<br>interaction <sup>1</sup> | P-<br>interaction <sup>2</sup> | P-<br>interaction <sup>3</sup> |
|------------------------------------|----------------------------------------------|---------------------------------|----------------------------------|---------------------------------|----------------------|----------------------|----------------------|--------------------------------|--------------------------------|--------------------------------|
| <b>Among ALL</b>                   | 91/158/58                                    | 27.41 (26.02 – 28.80)           | 26.22 (25.24 – 27.20)            | 25.40 (23.75 – 27.05)           | 0.06                 | 0.11                 | 0.07                 | –                              | –                              | –                              |
| <b>Carbohydrates (% of energy)</b> |                                              |                                 |                                  |                                 |                      |                      |                      |                                |                                |                                |
| Tertile 1 (<47.317)                | 30/48/25                                     | 29.14 (26.37 – 31.92)           | 27.39 (25.76 – 29.02)            | 26.79 (24.31 – 29.28)           | 0.17                 | 0.38                 | 0.38                 | 0.59                           | 0.88                           | 0.89                           |
| Tertile 2 (47.317 – 53.984)        | 29/64/15                                     | 27.89 (25.44 – 30.34)           | 25.60 (23.93 – 27.27)            | 24.60 (21.10 – 28.10)           | 0.12                 | 0.036                | 0.036                |                                |                                |                                |
| Tertile 3 (>53.984)                | 32/46/18                                     | 25.35 (23.30 – 27.40)           | 25.86 (24.04 – 27.67)            | 24.14 (20.89 – 27.39)           | 0.50                 | 0.63                 | 0.63                 |                                |                                |                                |
| <b>Fat (% of energy)</b>           |                                              |                                 |                                  |                                 |                      |                      |                      |                                |                                |                                |
| Tertile 1 (<35.131)                | 32/43/17                                     | 27.17 (25.09 – 29.26)           | 27.03 (25.00 – 29.06)            | 25.65 (21.72 – 29.58)           | 0.44                 | 0.83                 | 0.83                 | 0.84                           | 0.99                           | 0.88                           |
| Tertile 2 (35.131 – 41.333)        | 30/63/18                                     | 28.55 (25.66 – 31.44)           | 26.42 (24.80 – 28.04)            | 24.75 (21.83 – 27.67)           | 0.06                 | <b>0.014</b>         | <b>0.014</b>         |                                |                                |                                |
| Tertile 3 (>41.333)                | 29/52/23                                     | 26.49 (24.04 – 28.94)           | 25.30 (23.74 – 26.86)            | 25.73 (23.27 – 28.19)           | 0.64                 | 0.75                 | 0.75                 |                                |                                |                                |
| <b>Protein (% of energy)</b>       |                                              |                                 |                                  |                                 |                      |                      |                      |                                |                                |                                |
| Tertile 1 (<11.700)                | 39/58/23                                     | 27.00 (24.90 – 29.10)           | 25.22 (23.65 – 26.80)            | 24.11 (21.49 – 26.74)           | 0.08                 | 0.27                 | 0.27                 | 0.94                           | 0.49                           | 0.50                           |
| Tertile 2 (11.700 – 13.985)        | 31/50/15                                     | 26.27 (24.08 – 28.46)           | 25.50 (23.76 – 27.25)            | 25.83 (22.04 – 29.62)           | 0.82                 | 0.71                 | 0.71                 |                                |                                |                                |
| Tertile 3 (>13.985)                | 21/50/20                                     | 29.86 (26.40 – 33.32)           | 28.09 (26.32 – 29.86)            | 26.56 (23.70 – 29.42)           | 0.11                 | 0.07                 | 0.07                 |                                |                                |                                |
| <b>Saturated fat (% of energy)</b> |                                              |                                 |                                  |                                 |                      |                      |                      |                                |                                |                                |
| Tertile 1 (<8.595)                 | 26/42/17                                     | 28.25 (25.40 – 31.11)           | 26.60 (24.74 – 28.46)            | 25.59 (21.48 – 29.69)           | 0.21                 | 0.90                 | 0.90                 | 0.73                           | 0.32                           | 0.36                           |
| Tertile 2 (8.595 – 11.034)         | 29/65/10                                     | 25.37 (23.36 – 27.39)           | 25.25 (23.74 – 26.76)            | 25.88 (22.31 – 29.45)           | 0.81                 | 0.64                 | 0.64                 |                                |                                |                                |
| Tertile 3 (>11.034)                | 36/51/31                                     | 28.44 (26.03 – 30.86)           | 27.14 (25.31 – 26.97)            | 25.15 (23.03 – 27.26)           | 0.041                | 0.035                | 0.035                |                                |                                |                                |
| <b>MUFA (% of energy)</b>          |                                              |                                 |                                  |                                 |                      |                      |                      |                                |                                |                                |
| Tertile 1 (<11.890)                | 30/41/21                                     | 27.55 (25.23 – 29.88)           | 26.02 (24.02 – 28.01)            | 24.98 (21.68 – 28.29)           | 0.17                 | 0.13                 | 0.13                 | 0.81                           | 0.56                           | 0.52                           |
| Tertile 2 (11.890 – 14.571)        | 29/66/15                                     | 27.67 (24.94 – 30.39)           | 27.04 (25.48 – 28.59)            | 26.31 (22.96 – 29.66)           | 0.51                 | 0.75                 | 0.75                 |                                |                                |                                |
| Tertile 3 (>14.571)                | 32/51/22                                     | 27.04 (24.60 – 29.49)           | 25.32 (23.65 – 26.99)            | 25.19 (22.70 – 27.67)           | 0.28                 | 0.37                 | 0.37                 |                                |                                |                                |
| <b>PUFA (% of energy)</b>          |                                              |                                 |                                  |                                 |                      |                      |                      |                                |                                |                                |
| Tertile 1 (<8.426)                 | 39/47/21                                     | 27.62 (25.57 – 29.67)           | 26.40 (24.45 – 28.35)            | 25.73 (22.32 – 29.14)           | 0.30                 | 0.24                 | 0.24                 | 0.66                           | 0.40                           | 0.38                           |
| Tertile 2 (8.426 – 10.930)         | 29/61/18                                     | 28.43 (25.56 – 31.31)           | 27.29 (25.62 – 28.96)            | 24.99 (22.49 – 27.48)           | 0.22                 | 0.08                 | 0.08                 |                                |                                |                                |
| Tertile 3 (>10.930)                | 23/50/19                                     | 25.76 (23.17 – 28.34)           | 24.74 (23.28 – 26.20)            | 25.43 (22.46 – 28.41)           | 0.85                 | 0.95                 | 0.95                 |                                |                                |                                |

<sup>1</sup>p-value crude

<sup>2</sup>p-value adjusted for age and sex

<sup>3</sup>p-value adjusted for age, sex and physical activity



**Table S9.** Interaction between **physical activity** and the three SNPs on **BMI (kg/m<sup>2</sup>)**, **body fat (kg)**, and **muscle mass (kg)**

|                                  | Mean (95% CI)                                   | Mean (95% CI)         | Mean (95% CI)         | P-trend <sup>1</sup> | P-trend <sup>2</sup> | P-interaction <sup>1</sup> | P-interaction <sup>2</sup> |
|----------------------------------|-------------------------------------------------|-----------------------|-----------------------|----------------------|----------------------|----------------------------|----------------------------|
| <b><i>FTO (rs1558902)</i></b>    | <b><i>TT</i></b>                                | <b><i>TA</i></b>      | <b><i>AA</i></b>      |                      |                      |                            |                            |
|                                  | <b>BMI (kg/m<sup>2</sup>)</b>                   |                       |                       |                      |                      |                            |                            |
| Low level of exercise            | 29.29 (27.06 – 31.52)                           | 28.69 (27.27 – 30.11) | 27.82 (25.72 – 29.93) | 0.33                 | 0.29                 | 0.47                       | 0.36                       |
| Moderate level of exercise       | 28.94 (27.33 – 30.54)                           | 27.05 (25.78 – 28.32) | 28.29 (25.79 – 30.79) | 0.65                 | 0.87                 |                            |                            |
| High level of exercise           | 26.73 (24.17 – 29.29)                           | 25.26 (23.76 – 26.76) | 27.82 (21.99 – 33.65) | 0.61                 | 0.38                 |                            |                            |
|                                  | <b>Body fat (kg)</b>                            |                       |                       |                      |                      |                            |                            |
| Low level of exercise            | 28.80 (24.51 – 33.10)                           | 28.01 (25.21 – 30.82) | 27.46 (23.44 – 31.49) | 0.65                 | 0.49                 | 0.94                       | 0.72                       |
| Moderate level of exercise       | 27.42 (23.96 – 30.88)                           | 24.99 (22.34 – 27.64) | 26.89 (21.73 – 32.05) | 0.86                 | 0.84                 |                            |                            |
| High level of exercise           | 25.52 (19.64 – 31.40)                           | 20.60 (17.41 – 23.80) | 26.55 (14.92 – 38.19) | 0.82                 | 0.63                 |                            |                            |
|                                  | <b>Muscle mass (kg)</b>                         |                       |                       |                      |                      |                            |                            |
| Low level of exercise            | 27.39 (25.17 – 29.62)                           | 26.68 (25.23 – 28.13) | 24.52 (22.03 – 27.01) | 0.07                 | 0.07                 | 0.48                       | 0.79                       |
| Moderate level of exercise       | 28.26 (25.54 – 30.99)                           | 26.11 (24.39 – 27.83) | 26.26 (22.96 – 29.56) | 0.32                 | 0.69                 |                            |                            |
| High level of exercise           | 26.42 (23.39 – 29.45)                           | 26.06 (24.06 – 28.05) | 25.47 (22.14 – 28.81) | 0.68                 | 0.43                 |                            |                            |
| <b><i>TCF7L2 (rs7903146)</i></b> | <b><i>CC</i></b>                                | <b><i>CT</i></b>      | <b><i>TT</i></b>      |                      |                      |                            |                            |
|                                  | <b>Body mass index (BMI) (kg/m<sup>2</sup>)</b> |                       |                       |                      |                      |                            |                            |
| Low level of exercise            | 28.87 (27.08 – 30.67)                           | 28.54 (27.17 – 29.91) | 28.46 (25.05 – 31.86) | 0.80                 | 0.84                 | 0.38                       | 0.47                       |
| Moderate level of exercise       | 27.17 (25.88 – 28.46)                           | 28.51 (26.83 – 30.20) | 28.07 (25.56 – 30.57) | 0.52                 | 0.65                 |                            |                            |
| High level of exercise           | 26.17 (24.15 – 28.20)                           | 25.08 (23.18 – 26.97) | 28.61 (23.54 – 33.68) | 0.23                 | 0.33                 |                            |                            |
|                                  | <b>Body fat (kg)</b>                            |                       |                       |                      |                      |                            |                            |
| Low level of exercise            | 26.94 (25.49 – 32.38)                           | 27.64 (24.91 – 30.38) | 27.42 (21.11 – 33.73) | 0.64                 | 0.67                 | 0.69                       | 0.64                       |
| Moderate level of exercise       | 24.78 (21.99 – 27.57)                           | 28.07 (24.99 – 31.16) | 24.86 (18.94 – 30.79) | 0.98                 | 0.99                 |                            |                            |
| High level of exercise           | 24.42 (19.78 – 29.07)                           | 20.20 (16.14 – 24.27) | 26.38 (16.44 – 36.32) | 0.65                 | 0.58                 |                            |                            |
|                                  | <b>Muscle mass (kg)</b>                         |                       |                       |                      |                      |                            |                            |
| Low level of exercise            | 26.51 (24.75 – 28.27)                           | 26.54 (24.92 – 28.16) | 25.48 (22.56 – 28.40) | 0.56                 | 0.33                 | 0.16                       | 0.24                       |
| Moderate level of exercise       | 26.90 (25.25 – 28.56)                           | 25.35 (23.33 – 27.38) | 28.64 (23.18 – 34.09) | 0.38                 | 0.40                 |                            |                            |
| High level of exercise           | 25.16 (22.86 – 27.45)                           | 26.28 (23.91 – 28.64) | 28.38 (24.91 – 31.85) | 0.14                 | 0.19                 |                            |                            |
| <b><i>FTO (rs9939609)</i></b>    | <b><i>TT</i></b>                                | <b><i>TA</i></b>      | <b><i>AA</i></b>      |                      |                      |                            |                            |
|                                  | <b>Body mass index (BMI) (kg/m<sup>2</sup>)</b> |                       |                       |                      |                      |                            |                            |
| Low level of exercise            | 29.53 (27.21 – 31.85)                           | 28.37 (27.00 – 29.73) | 28.40 (26.16 – 30.63) | 0.46                 | 0.46                 | 0.48                       | 0.48                       |
| Moderate level of exercise       | 28.76 (27.37 – 30.14)                           | 26.51 (25.13 – 27.90) | 29.22 (26.89 – 31.56) | 0.72                 | 0.72                 |                            |                            |
| High level of exercise           | 26.93 (24.45 – 29.41)                           | 25.09 (23.56 – 26.63) | 28.34 (22.74 – 33.93) | 0.49                 | 0.41                 |                            |                            |
|                                  | <b>Body fat (kg)</b>                            |                       |                       |                      |                      |                            |                            |
| Low level of exercise            | 28.98 (24.40 – 33.55)                           | 27.60 (24.96 – 30.24) | 28.37 (23.99 – 31.76) | 0.84                 | 0.82                 | 0.94                       | 0.89                       |
| Moderate level of exercise       | 27.11 (24.12 – 30.09)                           | 24.01 (21.09 – 26.93) | 29.00 (24.23 – 33.76) | 0.49                 | 0.67                 |                            |                            |
| High level of exercise           | 25.93 (20.25 – 31.62)                           | 20.47 (17.25 – 23.69) | 26.85 (15.45 – 38.25) | 0.83                 | 0.93                 |                            |                            |
|                                  | <b>Muscle mass (kg)</b>                         |                       |                       |                      |                      |                            |                            |
| Low level of exercise            | 27.60 (25.32 – 29.89)                           | 26.24 (24.82 – 27.66) | 25.39 (22.77 – 28.02) | 0.17                 | 0.04                 | 0.88                       | 0.78                       |
| Moderate level of exercise       | 27.98 (25.60 – 30.37)                           | 25.94 (24.05 – 27.82) | 26.40 (23.35 – 29.45) | 0.40                 | 0.94                 |                            |                            |
| High level of exercise           | 26.33 (23.44 – 29.23)                           | 26.54 (24.47 – 28.62) | 23.79 (20.63 – 26.96) | 0.26                 | 0.48                 |                            |                            |

<sup>1</sup>p-value crude <sup>2</sup>p-value adjusted for age and sex
